# Supplementary material for: An association between feather damaging behavior and corticosterone metabolite excretion in captive African grey parrots (Psittacus erithacus)
Source: PeerJ. 2016 Sep 13;4:e2462. doi: 10.7717/peerj.2462 (PMC5028759; doi:10.7717/peerj.2462)
Supplement: Supplemental Information 1 — The sample was taken in two periods (in the middle of autumn 2014 and spring 2015). Three samples of birds were considered: PR, parent raised parrots; reared in pair for reproduction, all parrot in the same facility; H-HR, healthy-hand reared parrot; individually reared, each with a different owner; FDB-HR, feather damaging behavior parrots; individually reared, each with a different owner. For each individual parrot or pair the following data are provided: Sex (M, male or F, female), age (individual age or pair mean age for H-HR/FDB- HR or PR, respectively). [file peerj-04-2462-s001.xlsx]

## Sheet: cort raw data
GROUP	COD GROUP	n. bird	SEX	AGE	CORT_METAB_ Autumn 2014	CORT_METAB_Spring 2015
PR	1	2	pair (M+F)	8	534.507	481.144
PR	1	2	pair (M+F)	8	433.6	553.85
PR	1	2	pair (M+F)	6	462.4	328.244
PR	1	2	pair (M+F)	10	572.4	566.63
PR	1	2	pair (M+F)	8	734.56	600.24
PR	1	2	pair (M+F)	7	801.36	702.42
PR	1	2	pair (M+F)	7	729.32	639.24
PR	1	2	pair (M+F)	8	796.9	518.309
PR	1	2	pair (M+F)	9	810.46	342.17
PR	1	2	pair (M+F)	10	466.76	669.32
PR	1	2	pair (M+F)	12	792.4	638.98
PR	1	2	pair (M+F)	6	616.4	512.776
PR	1	2	pair (M+F)	6	521.52	671.68
PR	1	2	pair (M+F)	6	624.8	421.17
PR	1	2	pair (M+F)	8	545.72	360.08
PR	1	2	pair (M+F)	9	854.4	746.24
PR	1	2	pair (M+F)	9	398.64	376.92
PR	1	2	pair (M+F)	7	595.67	494.51
PR	1	2	pair (M+F)	7	832.4	782.28
PR	1	2	pair (M+F)	7	577.2	446.698
PR	1	2	pair (M+F)	6	487.58	641.925
PR	1	2	pair (M+F)	7	495.45	338.9
PR	1	2	pair (M+F)	8	533.6	928.281
PR	1	2	pair (M+F)	8	578.68	416.69
PR	1	2	pair (M+F)	8	456.86	413
PR	1	2	pair (M+F)	12	658	906.88
PR	1	2	pair (M+F)	6	782.98	714.085
PR	1	2	pair (M+F)	9	538.4	390.145
PR	1	2	pair (M+F)	10	498.88	360.037
PR	1	2	pair (M+F)	11	768.8	778.296
H-HR	2	1	M	12	968.2	775.48
H-HR	2	1	M	5	637.84	569.28
H-HR	2	1	F	5	358.92	515.75
H-HR	2	1	F	4	346.28	368.22
H-HR	2	1	M	9	456.32	285.105
H-HR	2	1	M	19	741.2	529.24
H-HR	2	1	M	8	442	409.24
H-HR	2	1	M	4	398.24	436.792
H-HR	2	1	F	3	426.24	241.953
H-HR	2	1	F	3	402.96	439.729
H-HR	2	1	M	15	526.34	585.47
FDB-HR	3	1	M	7	1751.12	1264.68
FDB-HR	3	1	M	5	1627.2	2282.6
FDB-HR	3	1	F	3	1856.8	1754.31
FDB-HR	3	1	M	7	1814.8	2055.72
FDB-HR	3	1	F	3	1416.8	1045.13
FDB-HR	3	1	F	5	1756.88	2075.66
FDB-HR	3	1	M	6	1605.2	1901.28
FDB-HR	3	1	M	14	1924.92	1937.01
FDB-HR	3	1	F	5	1547.2	993.28
FDB-HR	3	1	M	10	1917.2	2082.19
FDB-HR	3	1	M	21	2025.6	1741.11
